# Supplementary material for: The Impact of Being Homeless on the Clinical Outcomes of COVID-19: Systematic Review
Source: PubMed Central journal article supplement (PMC10540688; doi:10.3389/ijph.2023.1605893), 2023-09-15
Supplement: DataSheet1.pdf [file DataSheet1.pdf]

## Appendix A: Search Strategy of databases

### Medline via OVID 28.11.22

|    | String line                                                                                                                                                                                                                                                                                                                                                                                                      | Number of results |
|----|------------------------------------------------------------------------------------------------------------------------------------------------------------------------------------------------------------------------------------------------------------------------------------------------------------------------------------------------------------------------------------------------------------------|-------------------|
| 1  | exp Coronavirus/                                                                                                                                                                                                                                                                                                                                                                                                 | 160423            |
| 2  | COVID-19/                                                                                                                                                                                                                                                                                                                                                                                                        | 210509            |
| 3  | ((corona* or corono*) adj1 (virus* or viral* or virinae*)).ti,ab,kw                                                                                                                                                                                                                                                                                                                                              | 5338              |
| 4  | (coronavirus* or coronovirus* or coronaviri* or 2019-nCoV or 2019nCoV or nCoV2019 or nCoV-2019 or covid-19* or covid19* or ncov* or n-cov* or HCoV* or SARS-CoV-2 or SARSCoV-2 or SARSCov2 or SARS-CoV2 or severe acute respiratory syndrome).ti,ab,kw                                                                                                                                                           | 341577            |
| 5  | ((outbreak* or pandemic* or epidemic*) adj10 (wuhan or hubei or china or Chinese or Huanan)).ti,ab,kw                                                                                                                                                                                                                                                                                                            | 11698             |
| 6  | 1 or 2 or 3 or 4 or 5                                                                                                                                                                                                                                                                                                                                                                                            | 359003            |
| 7  | exp homeless persons/ or exp homeless man/ or exp homeless youth/ or exp homeless woman                                                                                                                                                                                                                                                                                                                          | 10711             |
| 8  | (homeless* or unhouse* or unshelter* or roofless* or houseless* or "sleeping on the street*" or "living on the street*" or "sleeping rough" or "living rough" or "rough sleep*" or "street person*" or "street people" or "street liv*" or "without a roof").ti,ab.                                                                                                                                              | 13499             |
| 9  | ("no fixed address*" or "no fixed abode" or "unstable hous*" or "hous* instability" or "lack of hous*" or "vulnerably hous*" or "night shelter" or "transition hous*" or "supported hous*" or "emergency hous*" or "emergency shelter*" or "temporary accommodation" or "emergency accommodation" or "insecure accommodation" or "precarious hous*" or "seeking shelter" or "couch surf*" or "sofa surf*").ti,ab | 2225              |
| 10 | (street dwell* or improvised dwell* or shelter dwell* or sleeping out* or street involved).ti,ab                                                                                                                                                                                                                                                                                                                 | 301               |
| 11 | ((without or no or "lack of" or inadequate*) adj1 (hous* or accommodation* or shelter* or hostel* or dwell*)).ti,ab                                                                                                                                                                                                                                                                                              | 1819              |
| 12 | ((homeless* or street or transient* or marginal* or vulnerabl* or temporary or unstabl* or vulnerabl* or insecure or support* or transition*) adj2 (hous* or accomondation* or shelter* or hostel* or dwell*)).ti,ab.                                                                                                                                                                                            | 5687              |
| 13 | 7 or 8 or 9 or 10 or 11 or 12                                                                                                                                                                                                                                                                                                                                                                                    | 21709             |
| 14 | 6 and 13                                                                                                                                                                                                                                                                                                                                                                                                         | 949               |
