# Supplementary material for: The Impact of Being Homeless on the Clinical Outcomes of COVID-19: Systematic Review
Source: PubMed Central journal article supplement (PMC10540688; doi:10.3389/ijph.2023.1605893), 2023-09-15
Supplement: DataSheet2.pdf [file DataSheet2.pdf]

## Appendix B-Abbreviated ETHOS framework of homelessness and housing exclusion

**Table 1.** Abbreviated ETHOS framework of homelessness and housing exclusion (20)

|                   | <b>Operational Category</b>                                   | <b>Living Situation</b>                                               |
|-------------------|---------------------------------------------------------------|-----------------------------------------------------------------------|
| <b>Roofless</b>   | 1. People Living Rough                                        | Public or external space                                              |
|                   | 2. People in emergency accommodation                          | Night shelter                                                         |
| <b>Houseless</b>  | 3. People in accommodation for homeless                       | Hostel, temporary or transitional accommodation                       |
|                   | 4. People in Women’s Shelter                                  | Women’s shelter                                                       |
|                   | 5. People in accommodation for immigrants                     | Temporary or migrant workers accommodation                            |
|                   | 6. People due to be released from institutions                | Penal, medical or children’s institutions                             |
| <b>Insecure</b>   | 7. People receiving longer-term support (due to homelessness) | Residential care for older homeless people                            |
|                   | 8. People living in insecure accommodation                    | Temporarily with family/friends, no legal tenancy, illegal occupation |
|                   | 9. People living under threat of eviction                     | Legal or re-possession orders                                         |
|                   | 10. People living under threat of violence                    | Police recorded incidents                                             |
| <b>Inadequate</b> | 11. People living in temporary/non-conventional structures    | Mobile homes, non-conventional buildings, temporary structure         |
|                   | 12. People in unfit housing                                   | Occupied dwellings unfit for habitation                               |
|                   | 13. People living in extreme overcrowding                     | Highest national norm of overcrowding                                 |
